# Supplementary material for: Ventilatory Chemosensory Drive Is Blunted in the mdx Mouse Model of Duchenne Muscular Dystrophy (DMD)
Source: PubMed Central journal article supplement (PMC3726676; doi:10.1371/journal.pone.0069567), 2013-07-29

A

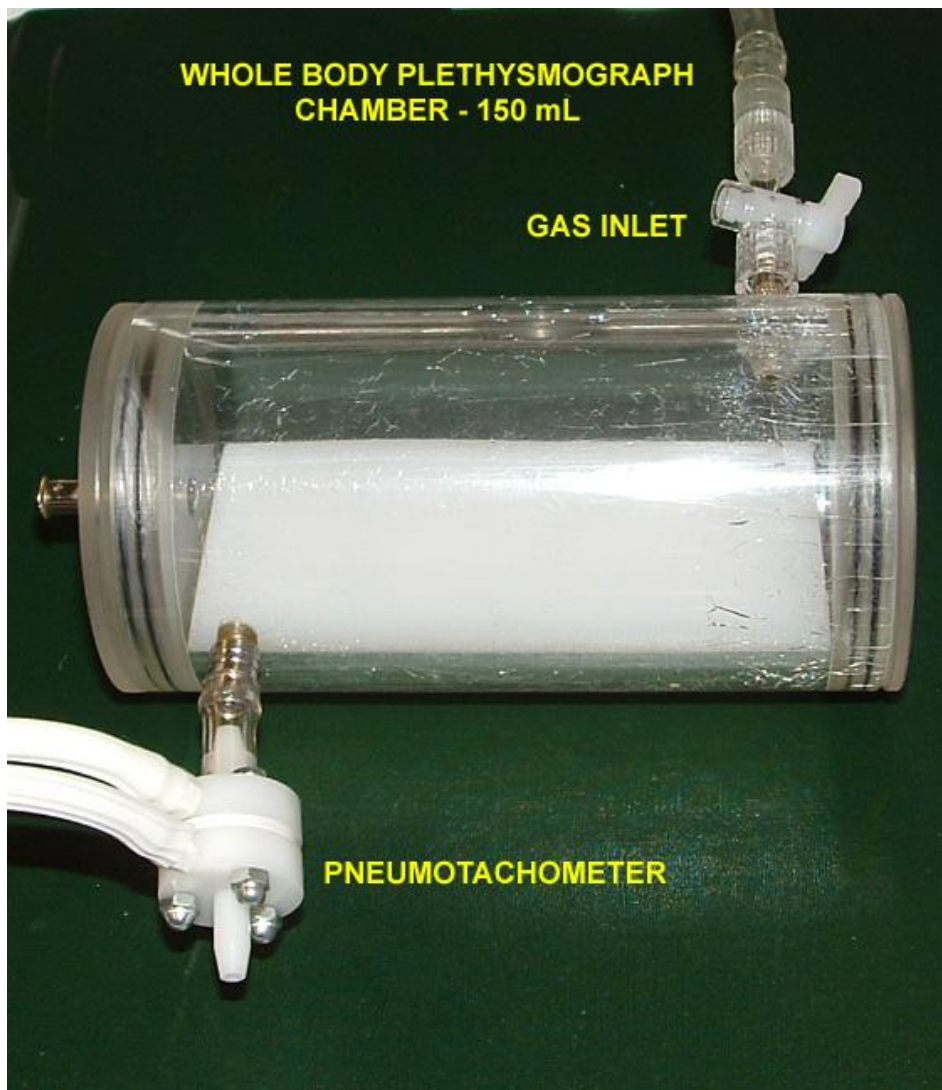

B

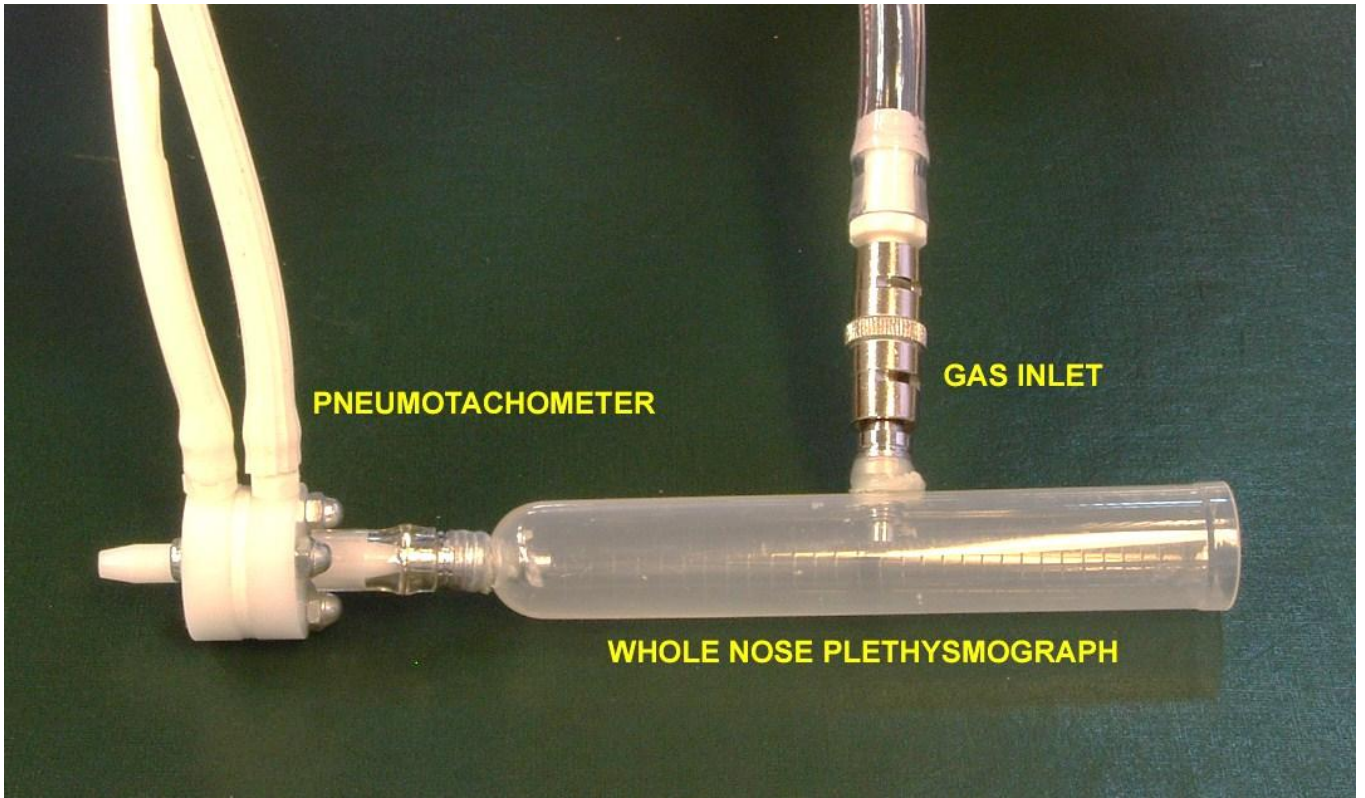

Supplement: pone.0069567.s001.pdf [file pone.0069567.s001.pdf]
