# Supplementary material for: Ventilatory Chemosensory Drive Is Blunted in the mdx Mouse Model of Duchenne Muscular Dystrophy (DMD)
Source: PubMed Central journal article supplement (PMC3726676; doi:10.1371/journal.pone.0069567), 2013-07-29
Supplement: pone.0069567.s004.pdf [file pone.0069567.s004.pdf]

Table S1. HVR for normal and *mdx* mice exposed to different FiO<sub>2</sub>.

| FiO <sub>2</sub> (%)          |            | 21            | 18            | 15            | 12           | 10           | 8            | 100          |
|-------------------------------|------------|---------------|---------------|---------------|--------------|--------------|--------------|--------------|
| <b>f<sub>R</sub></b> (Hz)     | Normal     | 3.28 ± 0.05   | 3.36 ± 0.7    | 3.70 ± 0.09   | 4.20 ± 0.08  | 4.28 ± 0.30  | 5.12 ± 0.20  | 2.90 ± 0.10  |
|                               | <i>mdx</i> | 2.95 ± 0.06*  | 3.05 ± 0.12*  | 3.22 ± 0.07*  | 4.00 ± 0.08  | 4.37 ± 0.060 | 5.10 ± 0.21  | 2.80 ± 0.04  |
| <b>V<sub>T</sub></b> (μl/g)   | Normal     | 4.97 ± 0.29   | 4.16 ± 0.08   | 4.57 ± 0.17   | 4.92 ± 0.15  | 4.85 ± 0.13  | 5.19 ± 0.28  | 4.02 ± 0.14  |
|                               | <i>mdx</i> | 4.39 ± 0.08*  | 4.23 ± 0.06   | 4.52 ± 0.09   | 5.20 ± 0.07  | 5.11 ± 0.10  | 4.94 ± 0.12  | 4.66 ± 0.21* |
| <b>V<sub>E</sub></b> (μl/s/g) | Normal     | 16.75 ± 0.99  | 15.74 ± 0.39  | 17.84 ± 1.18  | 19.57 ± 1.00 | 20.72 ± 0.97 | 26.59 ± 2.23 | 12.39 ± 0.53 |
|                               | <i>mdx</i> | 13.14 ± 0.33* | 12.77 ± 0.27* | 14.81 ± 0.35* | 21.72 ± 0.53 | 21.05 ± 0.62 | 24.33 ± 1.70 | 14.79 ± 0.54 |

Values are expressed as means ± SEM (n=5). \* P < 0.05.
