# Supplementary material for: Ventilatory Chemosensory Drive Is Blunted in the mdx Mouse Model of Duchenne Muscular Dystrophy (DMD)
Source: PubMed Central journal article supplement (PMC3726676; doi:10.1371/journal.pone.0069567), 2013-07-29
Supplement: pone.0069567.s005.pdf [file pone.0069567.s005.pdf]

Table S2. Phrenic nerve discharge from normal and *mdx* mice challenged to different FiO<sub>2</sub> exposure.

| FiO <sub>2</sub> (%) |            | 21           | 8           | 4           | 0           | 100          |
|----------------------|------------|--------------|-------------|-------------|-------------|--------------|
| f <sub>x</sub> (Hz)  | Normal     | 3.10 ± 0.19  | 3.78 ± 0.24 | 3.97 ± 0.28 | 4.80 ± 0.36 | 2.43 ± 0.14  |
|                      | <i>mdx</i> | 2.30 ± 0.11* | 3.58 ± 0.06 | 3.88 ± 0.10 | 4.05 ± 0.14 | 1.83 ± 0.13* |

Values are expressed as means ± SEM (n=4). \* P < 0.05.
