# Supplementary material for: Ventilatory Chemosensory Drive Is Blunted in the mdx Mouse Model of Duchenne Muscular Dystrophy (DMD)
Source: PubMed Central journal article supplement (PMC3726676; doi:10.1371/journal.pone.0069567), 2013-07-29
Supplement: pone.0069567.s006.pdf [file pone.0069567.s006.pdf]

Table S3. HCVR for normal and *mdx* mice challenged to different FiCO<sub>2</sub> exposure.

| FiCO <sub>2</sub> (%)         |            | 5% CO <sub>2</sub> + 95% AIR | 5% CO <sub>2</sub> + 95% O <sub>2</sub> | 10% CO <sub>2</sub> + 90% AIR | 10% CO <sub>2</sub> + 90% O <sub>2</sub> |
|-------------------------------|------------|------------------------------|-----------------------------------------|-------------------------------|------------------------------------------|
| <b>f<sub>R</sub></b> (Hz)     | Normal     | 5.3 ± 0.26                   | 4.97 ± 0.29                             | 5.42 ± 0.08                   | 5.3 ± 0.09                               |
|                               | <i>mdx</i> | 5.08 ± 0.16                  | 4.99 ± 0.20                             | 5.32 ± 0.09                   | 5.04 ± 0.14                              |
| <b>V<sub>T</sub></b> (μl/g)   | Normal     | 7.21 ± 0.38                  | 7.85 ± 0.45                             | 8.35 ± 0.13                   | 8.32 ± 0.40                              |
|                               | <i>mdx</i> | 6.75 ± 0.41                  | 7.27 ± 0.17                             | 7.89 ± 0.18                   | 8.58 ± 0.37                              |
| <b>V<sub>E</sub></b> (μl/s/g) | Normal     | 38.58 ± 3.49                 | 39.00 ± 4.42                            | 45.21 ± 1.07                  | 43.90 ± 1.88                             |
|                               | <i>mdx</i> | 36.59 ± 1.78                 | 36.60 ± 2.02                            | 43.54 ± 1.63                  | 44.80 ± 2.63                             |

Values are expressed as means ± SEM (n=5). \* P < 0.05.
