# Supplementary material for: Ventilatory Chemosensory Drive Is Blunted in the mdx Mouse Model of Duchenne Muscular Dystrophy (DMD)
Source: PubMed Central journal article supplement (PMC3726676; doi:10.1371/journal.pone.0069567), 2013-07-29
Supplement: pone.0069567.s007.pdf [file pone.0069567.s007.pdf]

Table S4. Chemosensory drive in *mdx* by Dejours maneuver. Values were analyzed 10 s after being exposed to hyperoxia and normalized to normoxic baseline.

|            | $f_R$ (%)          | $V_T$ (%)        | $V_E$ (%)           |
|------------|--------------------|------------------|---------------------|
| Normal     | $-5.71 \pm 1.09$   | $5.90 \pm 4.06$  | $0.32 \pm 3.55$     |
| <i>mdx</i> | $-1.02 \pm 1.38^*$ | $17.54 \pm 3.79$ | $-13.50 \pm 3.96^*$ |

Values are expressed as means  $\pm$  SEM (n=5). \* P < 0.05.
