# Supplementary material for: Ventilatory Chemosensory Drive Is Blunted in the mdx Mouse Model of Duchenne Muscular Dystrophy (DMD)
Source: PubMed Central journal article supplement (PMC3726676; doi:10.1371/journal.pone.0069567), 2013-07-29
Supplement: pone.0069567.s008.pdf [file pone.0069567.s008.pdf]

Table S5. Early HCVR in *mdx* mice. Values were analyzed 10 s after being exposed to hyperoxia and normalized to normoxic baseline.

| <b>FiCO<sub>2</sub> (%)</b> |            | <b>5% CO<sub>2</sub> + 95% AIR</b> | <b>5% CO<sub>2</sub> + 95% O<sub>2</sub></b> |
|-----------------------------|------------|------------------------------------|----------------------------------------------|
| <b>f<sub>R</sub> (%)</b>    | Normal     | 10.66 ± 2.36                       | 7.41 ± 1.83                                  |
|                             | <i>mdx</i> | 3.53 ± 1.05*                       | 3.71 ± 0.28*                                 |
| <b>V<sub>T</sub> (%)</b>    | Normal     | 29.48 ± 7.77                       | 12.60 ± 5.01                                 |
|                             | <i>mdx</i> | 12.89 ± 3.14*                      | 3.32 ± 0.39                                  |
| <b>V<sub>E</sub> (%)</b>    | Normal     | 46.09 ± 10.35                      | 20.68 ± 5.15                                 |
|                             | <i>mdx</i> | 17.29 ± 4.27*                      | 7.33 ± 0.54                                  |

Values are expressed as means ± SEM (n=5). \* P < 0.05.
